# Supplementary material for: Spatiotemporal Risk Intensification from Encroachment on Underground Oil Pipelines: A Proximity-Based Indexing Approach
Source: Research Square preprint supplement (doi:10.21203/rs.3.rs-7293238/v1), 2025-09-11
Supplement: Supplementary file 1 [file 16873276423e6698d5874f4f.docx]

|  | **Infrastructure Count** | | | | | **Mean Distance to Pipeline**  **(Metres)** | | **Standard Deviation**  **(Metres)** | | **Encroachment Ratio (ER)**  **(Percentage)** | | | | | **Encroachment Growth Rate (EGR)**  **(Percentage)** | | | | |
| --- | --- | --- | --- | --- | --- | --- | --- | --- | --- | --- | --- | --- | --- | --- | --- | --- | --- | --- | --- |
| **Date** | **HRZ** | **EZ** | **MRZ** | **LRZ** | **Total** | **HRZ** | **EZ** | **HRZ** | **EZ** | **HRZ** | **EZ** | **MRZ** | **LRZ** | **Total** | **HRZ** | **EZ** | **MRZ** | **LRZ** | **Total** |
| **Feb-08** | 22 | 60 | 38 | 3,179 | 3,239 | 31.34 | 58.57 | 12.15 | 24.44 | 0.68 | 1.85 | 1.17 | 0.98 | 2.83 |  |  |  |  |  |
| **Nov-11** | 24 | 64 | 40 | 3,216 | 3,280 | 30.08 | 56.97 | 12.43 | 25.24 | 0.73 | 1.95 | 1.22 | 0.98 | 2.93 | +9.1 | +6.7 | +5.3 | +1.2 | +1.3 |
| **Dec-13** | 52 | 136 | 84 | 4,210 | 4,346 | 29.83 | 56.96 | 11.49 | 25.32 | 1.20 | 3.13 | 1.93 | 0.97 | 4.10 | +116.7 | +112.5 | +110.0 | +30.9 | +32.5 |
| **Dec-14** | 55 | 139 | 84 | 4,327 | 4,466 | 30.55 | 56.86 | 12.02 | 25.03 | 1.23 | 3.11 | 1.88 | 0.97 | 4.08 | +5.8 | +2.2 | 0 | +2.8 | +2.8 |
| **Oct-17** | 86 | 199 | 113 | 5,269 | 5,468 | 29.78 | 55.95 | 11.97 | 26.54 | 1.57 | 3.64 | 2.07 | 0.96 | 4.60 | +56.4 | +43.2 | +34.5 | +21.8 | +22.4 |
| **Nov-19** | 100 | 227 | 127 | 5,613 | 5,840 | 28.50 | 55.80 | 12.52 | 27.75 | 1.71 | 3.89 | 2.17 | 0.96 | 4.85 | +16.3 | +14.1 | +12.4 | +6.5 | +6.8 |
| **Nov-20** | 109 | 238 | 129 | 5,912 | 6,150 | 29.22 | 55.10 | 12.49 | 26.68 | 1.77 | 3.87 | 2.10 | 0.96 | 4.83 | +9.0 | +4.8 | +1.6 | +5.3 | +5.3 |
| **Nov-21** | 119 | 287 | 168 | 6,266 | 6,553 | 28.34 | 54.92 | 12.61 | 25.91 | 1.82 | 4.38 | 2.56 | 0.96 | 5.34 | +9.2 | +20.6 | +30.2 | +6.0 | +6.6 |
| **Apr-24** | 142 | 313 | 171 | 6,695 | 7,008 | 27.65 | 52.30 | 13.33 | 27.43 | 2.03 | 4.47 | 2.44 | 0.96 | 5.42 | +19.3 | +9.1 | +1.8 | +6.8 | +6.9 |
